# Supplementary material for: Enhanced energy storage capabilities in PbHfO3-based antiferroelectric ceramics through delayed phase switching and induced multiphase transitions
Source: Royal Society of Chemistry journal article supplement (doi:10.1039/d4qi01188k), 2024-01-01
Supplement: d4qi01188k1.pdf [file d4qi01188k1.pdf]

## Supporting Information

### Enhanced Energy Storage Capabilities in PbHfO<sub>3</sub>-Based Antiferroelectric Ceramics through Delayed Phase Switching and Induced Multiphase Transitions

Jiawen Hu<sup>1</sup>, Zhongbin Pan<sup>1\*</sup>, Ling Lv<sup>1</sup>, Zhixin Zhou<sup>1</sup>, Xiqi Chen<sup>1</sup>, Hongzhen Xie<sup>1\*</sup>, Jinjun Liu<sup>1</sup>, Peng Li<sup>2</sup>, and Jiwei Zhai<sup>3\*</sup>

<sup>1</sup>School of Materials Science and Chemical Engineering, Ningbo University, Ningbo, Zhejiang, 315211, China. E-mail: panzhongbin@163.com, xiehongzhen@nbu.edu.cn

<sup>2</sup>School of Materials Science and Engineering, Liaocheng University, Liaocheng, Shandong, 252059, China.

<sup>3</sup>School of Materials Science & Engineering, Tongji University, 4800 Caoan Road, Shanghai 201804, China. E-mail: apzhai@tongji.edu.cn

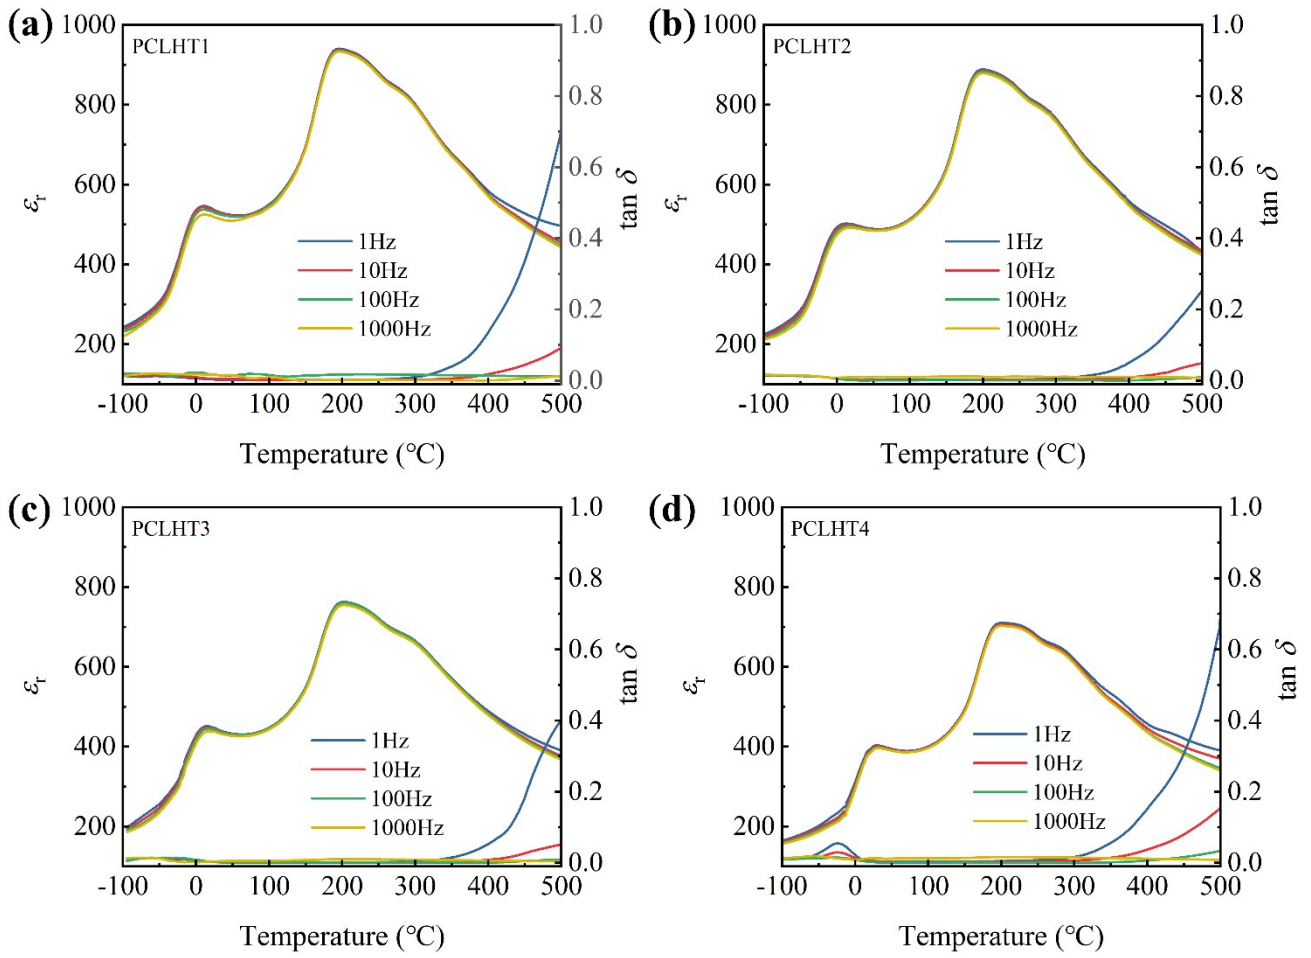

**Fig. S1** Temperature dependent permittivity and loss of PCLHT ceramics, (a) PCLHT1. (b) PCLHT2. (c) PCLHT3. (d) PCLHT4.

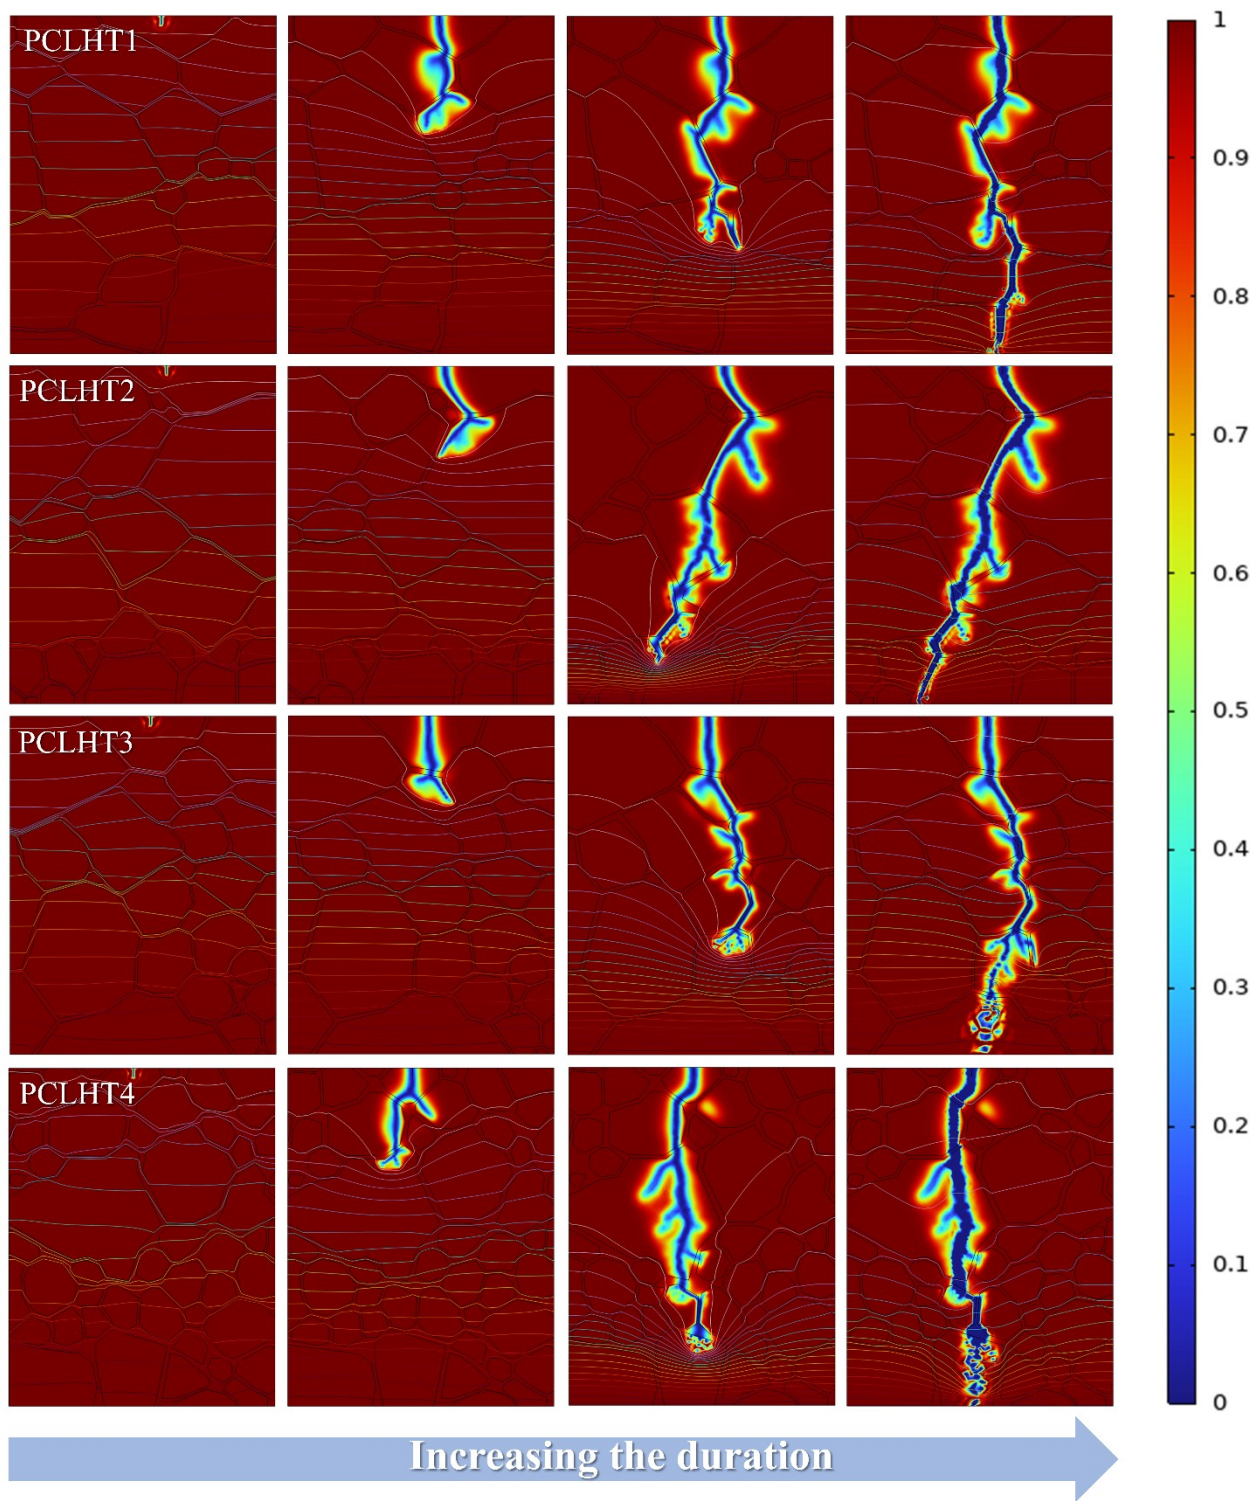

**Fig. S2** PCLHT ceramic electric tree evolution with time under  $E_b$ .

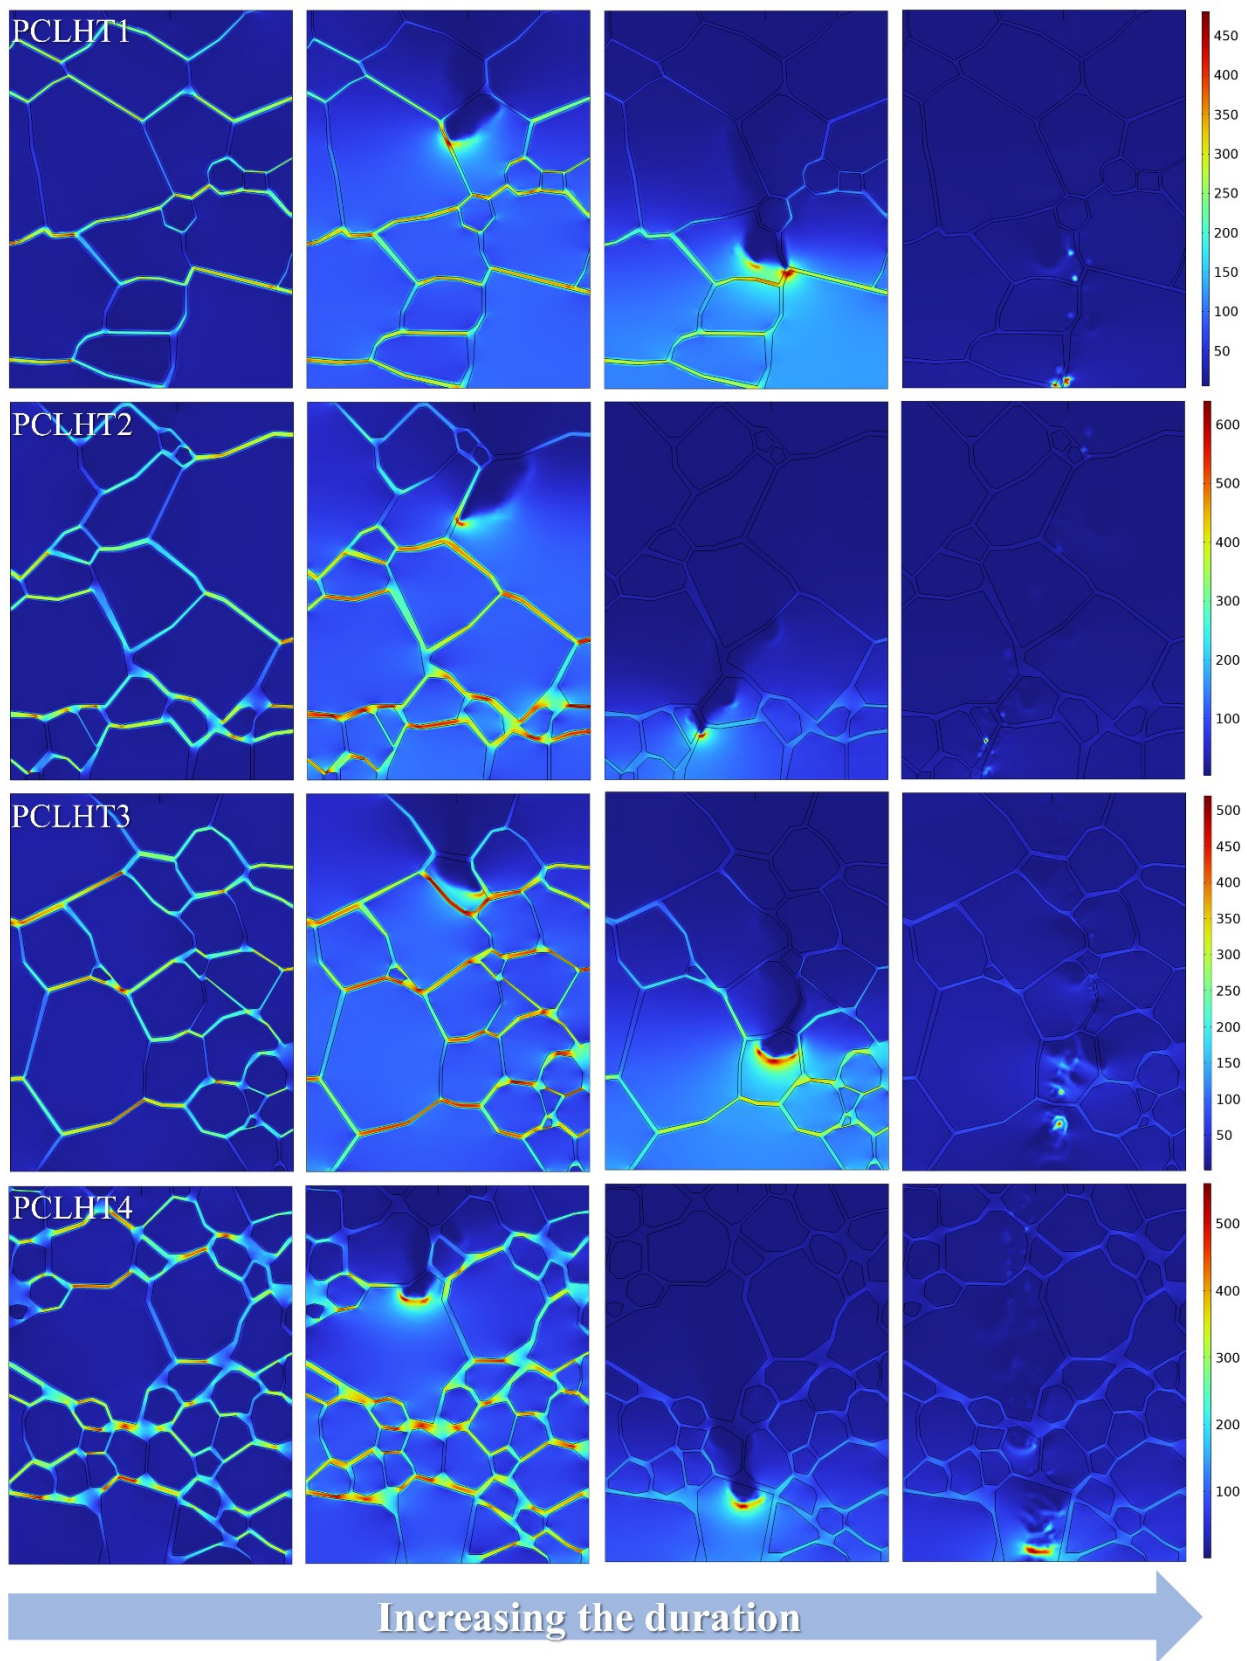

**Fig. S3** PCLHT ceramic electric field evolution with time under  $E_b$ .

Table S1 Refined lattice parameters and other agreement factors.

| Composition | Space group | $R_{wp}$ (%) | $\chi^2$ (%) | Volume ( $\text{\AA}^3$ ) | Lattice parameters ( $\text{\AA}$ ) |          |
|-------------|-------------|--------------|--------------|---------------------------|-------------------------------------|----------|
| x=0.01      | <i>Pbam</i> | 7.42         | 1.68         | 555.008                   | a                                   | 5.8296   |
|             |             |              |              |                           | b                                   | 11.64218 |
|             |             |              |              |                           | c                                   | 8.17761  |
| x=0.02      | <i>Pbam</i> | 7.71         | 1.81         | 554.86                    | a                                   | 5.83333  |
|             |             |              |              |                           | b                                   | 11.63445 |
|             |             |              |              |                           | c                                   | 8.17553  |
| x=0.03      | <i>Pbam</i> | 8.81         | 2.27         | 553.499                   | a                                   | 5.82735  |
|             |             |              |              |                           | b                                   | 11.63131 |
|             |             |              |              |                           | c                                   | 8.16615  |
| x=0.04      | <i>Pbam</i> | 8.45         | 1.99         | 552.62                    | a                                   | 5.81871  |
|             |             |              |              |                           | b                                   | 11.63004 |
|             |             |              |              |                           | c                                   | 8.16617  |
